# Supplementary material for: Automatically delineating the calving front of Jakobshavn Isbræ from multi-temporal TerraSAR-X images: a deep learning approach
Source: Copernicus journal article supplement (doi:10.5194/tc-2019-14), 2019-02-07
Supplement: Supplementary file [file tc-2019-14-AC2-supplement.pdf]

## Anonymous Referee #2

The authors use a deep convolutional neural network with a U-net architecture to delineate the calving fronts of Jakobshavn Isbrae between 2009 and 2015. The network achieves reasonable results, allowing the analysis of the interannual and season behavior of the two branches of the glacier. The authors determine three distinct phases of calving front behavior, which they partially attribute to the bed elevation. There are some issues with the manuscript regarding originality of the paper, ambiguous or incorrect technical comments, and lack of clarity in some aspects of the methods. However, it does add valuable results and showcases the uses of deep learning in SAR products. Therefore, I believe the article may be considered for publication after Major Revisions, once the following concerns have been addressed:

We highly appreciate the reviewer for the constructive comments which have significantly improved the quality of our manuscript. We have made our best effort to revise the manuscript based on the referee's comments and suggestions.

### Major Comment

As the first reviewer pointed out, despite the claim in the manuscript regarding the novelty of the technique, the methodology is very similar to that of Mohajerani et al. [2019] (<https://doi.org/10.3390/rs11010074>). However, this study does provide a different take on this technique and the authors should point out specifically how this work improves on previous efforts. For instance, the authors here use classification of surfaces in order to obtain the calving front, while Mohajerani et al use semantic segmentation to extract the front without classifying the surrounding surfaces. Each technique has strengths in different contexts. This and other differences should be discussed.

We have added a new subsection 7.1 titled **Differences from the previous work** to discuss the differences between our work and the method of Mohajerani et al. (2019), which are summarized as follows:

- Different strategies are used to classify calving fronts. Our study classifies the surface into two types (i.e., ice mélange and non-ice mélange) to extract the calving front; Mohajerani et al. (2019) use semantic segmentation to extract the front without classifying the surrounding surfaces.
- Additional manual practices such as finding a rotation angle for each glacier are needed in the work of Mohajerani et al. (2019).
- We subdivide the images into small patches, which allows us to use images with high resolutions and various size (i.e., TerraSAR-X images). Mohajerani et al. (2019) resampled images to a fixed size (240 by 152 pixels) with low spatial resolution (49.0 to 88.1 meters).

There are some statements that are not necessarily true from a technical point of view and raise some concern, which require revision:

- i) Page 6 Lines 12-15: This is not true. Even when using one architecture, the loss and/or accuracy metrics on the validation dataset can be used during training in order to avoid

overfitting, whereas the test dataset is only used after training. This is particularly important if the trained network is intended to be used in multiple areas.

We agree and have separated our data into three parts: training, validation, and test. We revised the relevant text as: *We separate all the SAR images into a training-validation dataset (75 images) and a test dataset (84 images) (Table S1). In the training-validation dataset, we randomly choose 90% as training data and take the rest as validation data.* (Page 7 Line 13-15)

ii) Page 7 Lines 7-8: This statement is not necessarily true and could be misleading. A larger kernel provides more context, but doesn't necessarily directly increase precision. It is dependent on the scale of the desired features to be extracted, depth of network, desired level of weight sharing, and many other factors.

Indeed, the accuracy relies on several factors such as the depth of the network and desired level of weight sharing. The primary purpose of increasing the kernel size is to get smoother calving fronts. We rephrased the relevant text as: *We utilize relatively large convolution kernel size (5 by 5) to obtain smoother calving fronts.* (Page 7 Line 7)

iii) Page 7 Line 27: It is not necessarily true that having more items in a batch reduces overfitting. This is dependent on the total number of epochs that the batches are cycled through and the rate of minimization of the loss function as a function of batch size. Large batches can indeed reduce generalizability (e.g. Keskar et al [2016] <https://arxiv.org/abs/1609.04836>).

We agree that a larger batch size would not reduce overfitting but actually reduce generalizability. Typically, batch sizes are no larger than 256. A large batch size would help to increase the efficiency and improves the accuracy of the gradient estimation at each step. Here, the batch size we use is three. We revised the relevant text as: *With a given GPU memory, a smaller patch size allows more items in a batch, which increases the efficiency and improves the accuracy of the gradient estimation at each step. To strike a balance between edge effect and batch size, we choose 960×720 pixels as our patch size and the batch size is three.* (Page 8 Line 22-24)

There is no proper measure of the extent of overfitting in the study. Without a validation dataset to keep track of overfitting during training, and no regularization in the network (or lack of discussion in the manuscript), one cannot make any statements about the generalizability of the model. This is exacerbated by the fact that the authors train and test the network on only one and the same glacier.

We have added the validation dataset and halted the training when the validation error stops to decrease with patience of 5 epochs (Page 7 Line 13-15; Page 9 Line 1-2). The optimizer we use has an L2 regularization term with a factor of 0.00001 (Page 7 Line 12). These strategies help to mitigate overfitting. We chose not to include the dropout layer because we found that

adding a dropout layer caused large fluctuations for both the training loss and validation loss at the end of training.

It would be helpful to provide more detailed information on the time requirements (e.g. Page 7 Lines 30-31) and the GPU model used in the study as a point of reference.

We have provided more detailed information on the time requirements (Page 8 Line 27). We do mention the used GPU model, Quadro P5000 GPU, in the Acknowledgment section. We prefer not to mention any brand name in the main part.

There is very little discussion on the actual architecture of the U-Net model. How many layers are used, what activation functions are used, etc.?

We have added one paragraph and a graph to describe the U-Net architecture (Page 6 Line 13, Page 7 Line 1-12, Figure S1). The architecture we use has 41 layers in total, including 23 convolutional layers and 18 batch normalization layers. The activation function in the last convolutional layer is Sigmoid, and the rest activation functions are LeakyReLU.

It would be more meaningful to put the errors in context. For example Page 8 Line 28, how much of the error is purely from the delineation alone, if you had multiple investigators manually delineate the same calving front? And how do these errors and those reported in Table S3 compare with the resolution of the image in terms of the number of pixels?

We agree that including the error from delineation alone would be more meaningful. We asked another investigator to manually delineate the calving fronts from six selected images. By comparing the two sets of independent delineation results, we obtained a mean difference of 33 meters (equivalent to ~5.5 pixels). We revised the relevant text as: *To measure the manual delineation error, we have another investigator to manually delineate the above-mentioned six calving fronts again. By comparing the two sets of independent delineation results, we obtained a mean difference of 33 meters (equivalent to ~5.5 pixels) (Table S2).* (Page 9 Line 23-26)

We have added the error in terms of the number of pixels in Table S3.

## Minor Comments

Page 1 Line 16: add “to” after “stabilized”.

We have revised as suggested (Page 1 Line16).

Page 3 Line 13: change “speeded up” to “sped up”

We have revised as suggested (Page 1 Line15).

Table S1: please statement more clearly if 0=test and 1=train to avoid confusion.

We have revised the caption of Table S1 as suggested.

Page 4 Line 15: How are boundaries dealt with in the averaging of pixels?

The images we use to delineate the calving front manually and to apply to the network are all multi-looked images. The original TerraSAR-X images have a high spatial resolution, and their pixel size is 1.25 meters. After reducing the image size by 25 times, the boundaries in the multi-looked images remain visually clear.

Page 7 Lines 3-4: It is not very clear how the calving front is delineated front the closest temporal neighbor. Is there a set distance threshold from the calving front of the reference image?

If the boundary is not clear in an image, we will find its closest temporal neighbor with a clear edge. By observing the texture variation due to the glacier movement, we can approximately decide where the calving front is for the blur image. Figure S3 gives an example of how we dealt with this issue. The manual delineation is all based on visual observations without any quantitative analysis.

Figure S4: “(c) and (c) show the manually delineated calving fronts” should be changed to “(c) and (d) [. . .]”.

We have revised the caption of Figure S3.

We have changed the order of the Figures in supporting information in the order they are referred to in the main manuscript:

Figure S1--> Figure S2

Figure S2--> Figure S4

Figure S3--> Figure S5

Figure S4--> Figure S3.

We have added one figure in supporting information to describe the network architecture (Figure S1).

Page 7 Line 19: Is rotation augmentation necessary if you are only working with one glacier here?

Without rotation augmentation, the trained network still can generate reasonable results. However, we prefer to keep the rotation augmentation since it could be helpful when we apply our method to other glaciers in the future.

Page 7 Line 20: Please explain what you mean by 2% linear stretch. Is this done separately in each direction (horizontal and vertical)?

We didn't do the linear stretch separately in each direction.

The linear stretching is to change the pixels' values to increase the contrast.

For all values between 2% and 98% of the pixel value range, we use the following equation to do the linear stretching

$$P_{stretched} = 255 * \frac{(P_{in} - P_{min})}{(P_{max} - P_{min})}.$$

Where  $P_{stretched}$  is the pixels' value after linear stretching and  $P_{in}$  is the pixels' value before stretching.  $P_{min}$  and  $P_{max}$  are the 2<sup>nd</sup> and 98<sup>th</sup> percentile in the histogram (that is, 2% of the pixels have values lower than  $P_{min}$ , and 2% of the pixels have values larger than  $P_{max}$  ).

For values lower than  $P_{min}$ , they are set as zero, and for values larger than  $P_{max}$ , they are set as 255.

We believe that "x% linear stretch" is a widely used terminology in remote sensing and therefore choose not to provide a detailed explanation in the manuscript.

Page 8 Lines 3-4: Just a suggestion: in order to avoid losing training data, you can change the weights in the loss function instead.

Thanks for your suggestion, but we prefer dropping out these one-class patches. By changing the weights in the loss function, we can indeed avoid losing training data. However, the primary purpose of dropping out one-class patches is to save computational power. The network may generate erroneous segmentation in the region that is away from the calving fronts due to dropping out one-class patches. However, we can fix this problem in post-processing by removing small isolated polygons caused by erroneous segmentation.

Page 8 Line 9: what threshold do you use to determine a “stable error”?

We have changed our strategy to avoid overfitting. With give patience of 5 epochs, if the validation loss stops to decrease, we halt the training process (Page 9 Line 1-2).

Figure 10: the magenta and red colors are very hard to distinguish. Please consider using a more contrasting color.

We have changed the line color from magenta to green.

Section 7.2: What are the limitations of the current technique?

We have added a new subsection 7.3 titled **Limitation of current method** to discuss the limitations of the current technique, which are summarized as follows:

- The U-Net architecture requires relatively high GPU memory.
- Splitting images with overlaps increase the training time.
- The accuracy of this method relies on manual delineation and the information richness of the training dataset.

Could imagery artifacts or more varied surfaces be dealt with?

As long as the calving fronts are clear in the images, imagery artifacts or more varied surfaces will not be a problem to the network. For example, with additional training, the network could handle images with low cloud cover (Figure R1) as well as Landsat 7 images with scan line errors (Figure R2). Note that the image in Figure R1 is not in the training dataset, and the image in Figure R2 is in the training dataset.

However, imagery artifacts such as image distortion need to be corrected by pre-processing procedures other than deep learning.

We did not include the results using Landsat -7 and -8 images since they are preliminary and beyond the scope of this manuscript.

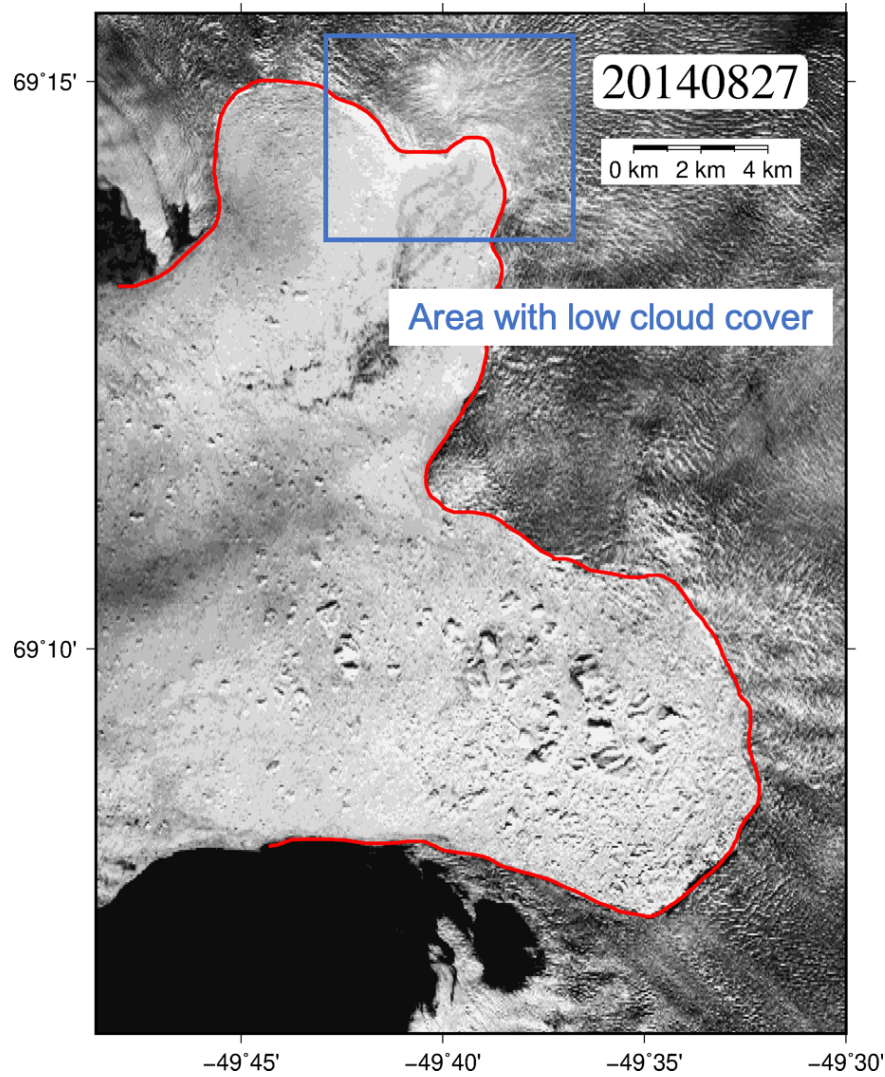

Figure R1. An example of automatically delineated calving front at Jakobshavn Isbrae using a Landsat 8 image with clouds. The image was taken on August 27<sup>th</sup>, 2014. The blue box indicates an area with low cloud cover.



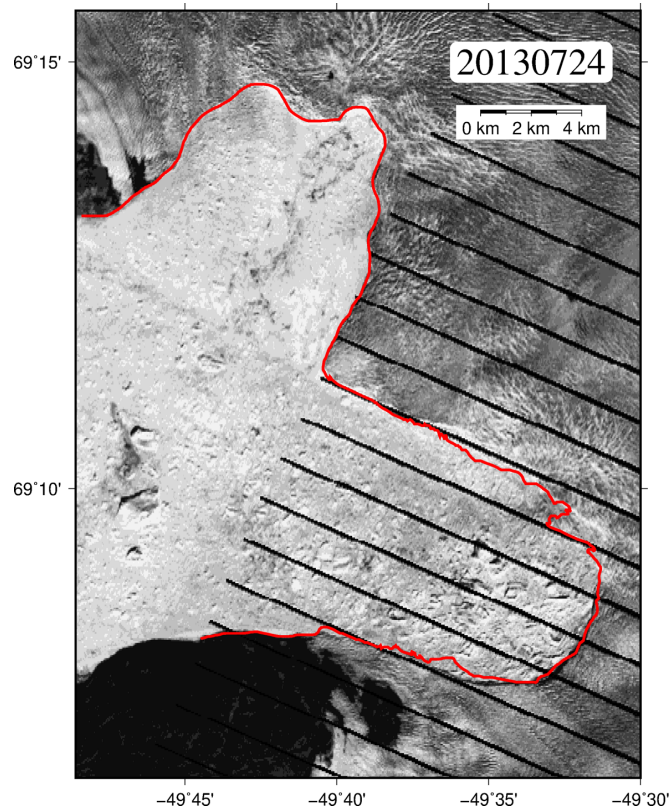

Figure R2. An example of automatically delineated calving front at Jakobshavn Isbrae using a Landsat 7 image with scan line errors. The image was taken on July 24<sup>th</sup>, 2013.

Can the trained network be applied to multiple glaciers or does it have to be retrained for every glacier?

Currently, if we want to apply the network to other glaciers, retraining is needed. We conducted a preliminary experiment by directly applying the network generated from this work as trained by TerraSAR-X imagery from Jakobshavn to Helheim (without including any new training data). Figure R3 is a superior example shows that the automatically delineated calving front at Helheim is very close to what one would get from visual inspection. Of course, we need to include more training examples from more glaciers to ensure reliable results on other glacier domains.

However, with more and more data from different glaciers included in the training dataset, the trained network has the potential to be applied to another glacier without retraining.

We did not include the results on other glacier domains since they are preliminary and beyond the scope of this manuscript.



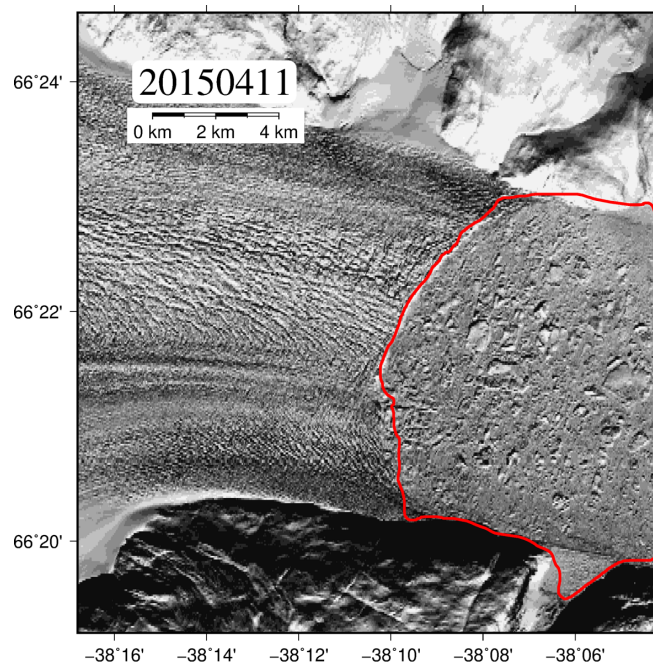

Figure R3. An example of automatically delineated calving front at Helheim. The background image is a Landsat 8 image taken on April 11<sup>th</sup>, 2015. The red line indicates the automatically delineated calving front.
